# Supplementary material
Source: PubMed Central journal article supplement (PMC4857726)
Supplement: NIHMS779772-supplement-Brustolini_suppl.pdf [file NIHMS779772-supplement-Brustolini_suppl.pdf]

# Supporting information- Experimental Procedures

## **Sustained NIK-mediated antiviral signaling confers broad-spectrum tolerance to begomoviruses in cultivated plants**

**Otávio J.B.Brustolini<sup>a,b\*</sup>, Joao Paulo B. Machado<sup>a,b\*</sup>, Jorge A. Condori-Apfata<sup>b</sup>, Daniela Coco<sup>a,b</sup>, Michihito Deguchi<sup>a,b</sup>, Virgílio A. P. Loriato<sup>a,b</sup>, Welison A. Pereira, Poliana Alfenas-Zerbini<sup>b</sup>, Francisco M. Zerbini<sup>b</sup>, Alice K. Inoue-Nagata<sup>b,d</sup>, Anesia A. Santos<sup>a,b</sup>, Joanne Chory<sup>e</sup>, Fabyano F. Silva<sup>c</sup>, Elizabeth P.B. Fontes<sup>a,b,&</sup>**

<sup>a</sup>Departamento de Bioquímica e Biologia Molecular <sup>b</sup>National Institute of Science and Technology in Plant-Pest Interactions, Bioagro, <sup>c</sup>Departamento de Zootecnia, Universidade Federal de Viçosa, 36570.000, Viçosa, MG, Brazil. <sup>d</sup>Embrapa Vegetables, Brasília, DF 70359-970, Brazil. <sup>e</sup>Howard Hughes Medical Institute and Plant Biology Laboratory, The Salk Institute for Biological Studies, La Jolla, California 92037, USA

\*These authors contributed equally to this work

&For correspondence:

Elizabeth B. P. Fontes, Departamento de Bioquímica e Biologia Molecular/Bioagro, National Institute of Science and Technology in Plant-Pest Interactions, Universidade Federal de Viçosa, 36570.000, Viçosa, MG, Brazil, phone +55 31 3899 2948 &email [bbfontes@ufv.br](mailto:bbfontes@ufv.br)

**Yeast strain and two-hybrid assays.** The NSP ORF was amplified from ToYSV DNA-B using PCR with the appropriate linkers and introduced through recombination into the entry vector pDONR201 to generate pDON-NSP-ToYSV, also designated as pUFV1323; the NSP ORF was subsequently transferred to the pDEST22 vector. The resulting clone pAD-NSP-ToYSV, also designated pUFV1370 or AD-NSPTY (Figure 1B), contained the GAL4 DNA-activating domain fused to the NSP-ToYSV sequence. Sequences encoding the mutant (T474D) kinase domain of NIK were transferred from pDON-T474D (Santos et al., 2009) to pDEST32 to yield pBD-T474D or BD-T474D (Figure 1B). The clones pAD-NSP-CaLCuV (AD-NSPCL, in Figure 1B) and pBD-KDNIK (BD-NIK in Figure 1B) have been previously described (Fontes et al., 2004).

The yeast two-hybrid assays were performed as previously described (Florentino et al., 2006). The yeast reporter strain AH109 (MATa, Trp1-901, leu2-3, 112, ura3-52, his3-200, gal4 $\Delta$ , LYS2::GAL1<sub>UAS</sub>-GAL1<sub>TATA</sub>-HIS3, MEL1 GAL2<sub>UAS</sub>.GAL<sub>TATA</sub>::MEL<sub>UAS</sub>-MEL1<sub>TATA</sub>.lacZ,) was cotransformed with AD-NSP fusions and pBD-NIK1 or pBD-T474D. The interactions were monitored by the ability of the reporter strain to grow on media lacking leucine, tryptophan, uracil and histidine, but supplemented with 25 mM 3-aminotriazole for 7 days at 30 °C. The interactions were further confirmed by measuring  $\beta$ -galactosidase activity in yeast extracts using o-nitrophenyl  $\beta$ -D-galactopyranoside substrate, as described previously (Uhrig et al., 1999).

**Phosphorylation assay.** To create plasmids for *E. coli* expression, the mutant NIK1 C-terminal kinase domain or intact NIK (KD, encoding amino acids 298–638) were amplified from the appropriate mutated clone, introduced by recombination into the entry vector pDONR201 and then transferred to the bacterial expression vector pDEST15, resulting in GST fused to mutant kinase domains, designated pGST-KDNIK1T474A or pGST-KDNIK1. The *E. coli*-expressed and purified KDNIK1T474D and KDNIK1 recombinant proteins were incubated alone or with NSP from CaLCuV, ToYSV or ToSRV at 25°C for 45 min in 30  $\mu$ L of kinase buffer containing 18 mM HEPES pH 7.4, 10 mM MgCl<sub>2</sub>, 10 mM MnSO<sub>4</sub>, 1 mM DTT, 10  $\mu$ M ATP and 5  $\mu$ Ci [ $\gamma$ -<sup>32</sup>P]ATP. Phosphoproteins were resolved by SDS-PAGE.

The gel was stained with Coomassie brilliant blue to verify protein loading, dried, and subjected to autoradiography. Incorporated radioactivity in protein bands was quantified by phosphoimaging and protein loading by densitometry using the Multi Gauge V3.0 software (Fujifilm).

**Bimolecular fluorescence complementation (BiFC) analysis.** For biochemical complementation of fluorescent fragments of yellow fluorescent protein (YFP), NSP and NIK were fused to the N-terminus (N) or C-terminus (C) of the reporter gene. Then, constructs expressing NSP-YFPC, NSP-YFPN, NIK-YFPC and NIK-YFPN in different combinations were co-agroinfiltrated in tobacco leaves in the presence of the suppressor of silencing HC-Pro according to a previously described protocol (Carvalho et al., 2008c). YFP fluorescence was observed by confocal microscopy.

**Tomato transformation.** The clone pK7F-NIK1T474D has been previously described (Santos et al., 2009). It harbors a GFP gene fused in-frame after the last codon of the mutant cDNA T474D under the control of the CaMV 35S promoter. In the mutant cDNA T474D, the threonine residue at position 474 within the activation loop of NIK1 was mutated to an aspartate residue. Leaf discs from *in vitro*-grown tomato plants (*Solanum lycopersicum*, cultivar Moneymaker) were transformed with pK7F-NIK1T474D via *Agrobacterium*-mediated plant transformation (strain LBA4404). The transformed shoots were selected on MS medium supplemented with 6-benzylaminopurine ( $500 \text{ mg.L}^{-1}$ ), cefotaxime ( $300 \text{ mg.L}^{-1}$ ), and kanamycin sulfate ( $50 \text{ mg.L}^{-1}$ ). The regenerated shoots were rooted, transferred into soil and grown under standardized greenhouse conditions to generate seeds. The transgenic lines were confirmed using PCR. The analysis of transgene expression was performed by RT-PCR and real-time RT-PCR using transgene-specific primers, and actin was used as an endogenous control to normalize all values. The transgenic lines 35S:NIK1-4 and 35S:NIK1-6 have been previously described (Carvalho et al., 2008c). They harbor the Arabidopsis NIK cDNA fused to a GFP cDNA under the control of the CaMV 35S promoter.

**RT-PCR and real-time RT-PCR analyses.** Total RNA was extracted from tomato leaves using TRIzol (Invitrogen). The reverse transcription (RT)-PCR assays were performed with 2 µg of total RNA, 0.5 mM of poly-dT and 1 U of M-MLV reverse transcriptase (Invitrogen Life Technologies, Inc.) as previously described (Delu-Filho et al., 2000). The PCR reaction was performed using virus-specific primers. The PCR comprised 30 cycles of 45 s at 94 °C, 30 s at 55 °C and 2 min at 72 °C. The real-time RT-PCR reactions were performed on an ABI7500 instrument (Applied Biosystems, Foster City, CA) using the SYBR Green PCR Master Mix (Applied Biosystems) as previously described (Costa et al., 2008). The amplification reactions were performed as follows: 2 min at 50°C, 10 min at 95°C and 40 cycles of 94°C for 15 sec and 60°C for 1 min. To confirm the quality and primer specificity, we verified the size of amplification products using 1.5% agarose gel electrophoresis and analyzed the T<sub>m</sub> (melting temperature) of the amplification products in a dissociation curve performed on the ABI7500 instrument. Actin was used as an endogenous control to normalize all values in the real-time RT-PCR assays. Gene expression was quantified using the 2<sup>ΔC<sub>T</sub></sup> method. The fold variation of gene expression was quantified using the comparative Ct method:  $2^{-(\Delta C_{T\text{Treatment}} - \Delta C_{T\text{Control}})}$ .

**Immunoblot analysis.** Total protein was extracted from the leaves of wild-type and T474D-overexpressing tomato transgenic seedlings as previously described (Cascardo et al., 2000). Following SDS-PAGE, the proteins were transferred from 10% SDS-polyacrylamide gels to nitrocellulose membranes by electroblotting. The membranes were blocked in NaCl/Tris containing 0.05% v/v Tween-20 and 5% w/v non-fat dry milk, and they were subsequently incubated with rabbit anti-GFP at a 1:10,000 dilution for 2 h at room temperature. The bound antibody was detected using alkaline-phosphatase-conjugated goat anti-rabbit IgG serum in conjunction with nitroblue tetrazolium/5-bromo-4-chloro-3-indolyl phosphate detection reagents (Bio-Rad).

**RNA sequencing method and data analysis.** The transgenic and wild-type lines were infected at the six-leaf stage with ToYSV-[MG-Bi2], as described below in infectivity assay. After 10 days post-inoculation,

total RNA from systemically infected leaves, as diagnosed by PCR, and mock-inoculated leaves from wild-type, 35S::NIK1-4 and 35S::T474D lines was isolated using TRIzol (Invitrogen). For the RNA sequencing experiments we used two biological replicates of a pool of 10 plants at 10 days after inoculation when we detected high levels of viral DNA in systemic leaves but symptoms were not visible as yet. The experimental design was 6 treatments as follow: mock-inoculated (mock WT, mock NIK1-OX, mock T474D) lines and infected (inf WT, inf NIK1-OX, inf T474D) lines with 2 repetitions. The RNA sequencing Illumina data was obtained using a Genome Analyzer in the Fasteris facilities. The GEX-NIaIII protocol was used with the following quality filter parameters: maximum of 1 base below a quality of 5 in the first 30 bases, a minimum average quality of 10, no “N” calls allowed and not more than 35 identical bases (low information reads). The data were stored in a comma-separated values (csv) spreadsheet file.

A systematic comparison in our tomato data set of five representative normalization methods with and without the correction factors for CG-content and gene length was performed using the Bioconductor packages edgeR (Robinson et al., 2010), DESeq (Yang et al., 2013), and EDASeq (Risso et al., 2011). We have also adopted as a comparative experimental design a pairwise comparison and a false discover rate (FDR) p-value adjustment with the cutoff  $< 0.05$ . Four of those normalization methods were implemented on the edgeR, such as total count (TC), upper quartile (UQ) (Bullard et al., 2010), relative log expression (RLE) (Anders and Huber, 2010) and trimmed mean of M values (TMM) (Robinson and Oshlack, 2010); the fifth was the normalization method implemented direct in DESeq package. The GC-content and gene length correction factors were performed by the Bioconductor package EDASeq (Risso et al., 2011). For differential gene expression (DGE) analysis, we employed the normalized data provided by the counting table to the most common negative binomial methods present in R/Bioconductor software, such as edgeR (Robinson et al., 2010), DESeq (Anders and Huber, 2010) and baySeq (Hardcastle et al., 2010). The parameter of dispersion was estimated by the tagwise program. Differential expression was determined using the FDR adjusted cutoff p-value of 0.05. The read mapping process was executed using the Bowtie program (Langmead et al., 2009) with the cDNA data set retrieved from the International Tomato

Annotation Group (ITAG - [http://solgenomics.net/organism/Solanum\\_lycopersicum/genome](http://solgenomics.net/organism/Solanum_lycopersicum/genome)), second release. Gene ontology classification was performed using the R/Bioconductor packages GSEABase and GOstats. The entire annotation data set from ITAG/Phytozome (<http://www.phytozome.net>) was stored in the relational database PostgreSQL 9.3 (<http://www.postgresql.org>). To detect gene set enrichment from our RNA-seq DE data, we used the GSEA method provided by the R/Bioconductor GSEABase package based on the Gene Ontology (GO) database (Ashburner et al., 2000). Clustering analysis was performed using the R package pvcust (Hierarchical Clustering with P-Values via Multiscale Bootstrap Resampling) using Ward's method (Ward, 1963), and heatmaps were generated using gplots. The results were stored in a relational database created in PostgreSQL, and a web interface was created using PHP to allow the database to be accessed and navigated (<http://tomatodb.inctipp.ufl.edu>). The RNA-seq data of T474D lines were submitted to NCBI-GEO, <http://www.ncbi.nlm.nih.gov/geo/info/linking.html>, accession number GSM932558.

***In vivo* labeling of leaf proteins.** Tomato seedlings (300 mg) were incubated with 1 mL of nutrient solution containing 50 µg/ml chloramphenicol and 20 µCi of [<sup>35</sup>S]methionine (EasyTag Protein Labeling Mix, [<sup>35</sup>S]-, 2mCi (74MBq), Perkin Elmer) for 3 h at room temperature. To quantitate incorporation of [<sup>35</sup>S]methionine into protein, aliquots of protein extracts were placed in 10% (w/v) TCA and incubated on ice for 30 min. The samples were filtered onto glass microfiber filters and the filters were washed three times with 5 ml of cold 5% (w/v) TCA and two times with 5 ml of 95% ethanol. After drying, the filters were counted with a scintillation counter.

**Polysome fractionation.** Polysomes were fractionated over sucrose gradients as described (Wang et al., 2003). Briefly, 500 mg of 15-day-old tomato seedlings were ground in liquid nitrogen and 1 mL of extraction buffer (0.2 M Tris-HCl, pH 8.0, 50 mM KCl, 25 mM MgCl<sub>2</sub>, 1% Triton X-100, 400 units/mL of RNasin and 50 mg/mL of cycloheximide). After centrifuging for 10 min, the supernatant was loaded onto a 10-mL 15% to 50% sucrose gradient and spun in a Beckman SW41Ti rotor at 135,000 g for 3.5 h.

Fractions were collected manually from the bottom, and total RNA was extracted with phenol/chloroform/isoamyl alcohol, precipitated with isopropanol, and treated with DNase I. The specific transcripts were amplified from RNA of T474D, NIK1 and wilt-type infected lines using qRT-PCR.

**Infectivity assays.** For the infectivity assays, we used T2 transgenic plants harboring the T474D mutant gene construct, which were derived from four independently regenerated kanamycin-resistant plants (35S::T474D-2, 35S::T474D-5, 35S::T474D-6 and 35S::T474D-9). We also used the previously described transgenic lines expressing AtNIK1 under the control of the CaMV 35S promoter, 35S::NIK1-4 and 35S::NIK1-6 (Carvalho et al., 2008c). The transgenic and wild-type lines were infected at the six-leaf stage with either ToYSV-[MG-Bi2] or ToSRV by biolistic delivery using tandemly repeated viral DNA-A and DNA-B and a microprojectile bombardment model PDS-1000/He accelerator (BIORAD) at 900 psi. In each experiment, 20 plants of each line were inoculated with 2 µg of tandemly repeated DNA-A plus DNA-B per plant and grown in a greenhouse under natural conditions of light, 70% relative humidity and approximately equal day and night lengths. Total nucleic acid was extracted from the systemically infected leaves (young leaves), and viral DNA was detected by PCR using DNA-A and DNA-B begomovirus-specific primers (PBL1v 2040, GCCTCTGCAGCARTGRTCKATCTTCATACA, and PCRC1, CTAGCTGCAGCATATTTACRARWATGCCA, or PAL1v1978, GCATCTGCAGGCCACATYGTCTTYCCNGT, and PAR1c496, AATACTGCAGGGCTTYCTRTRACATRGG) at 10 days post-infection.

**Quantitation of viral DNA in infected plants.** Viral DNA accumulation was measured by quantitative PCR (qPCR). The reactions were prepared in a final volume of 10 µl using the Fast SYBR Green Master Mix (Applied Biosystems) according to the manufacturer's instructions and analyzed on a 7500 Real Time PCR System (Applied Biosystems). Virus-specific primers were designed using Primer Express 3.0 (Applied Biosystems) and tested by conventional PCR using plasmids containing the complete DNA-A of each virus ( $10^6$  copies per reaction). The following primer sequences were used: ToSRVFwd,

CACGTGCCCACATCGTCTT, and ToSRVRev, GGCCGGAACGACCTATTA-3', or ToYSVFwd, CCACGATTTTAAAGCTGCATTCT, and ToYSVRev, CAATCCTGGTGAGGGAGTCAGT. For viral DNA quantitation, standard curves were prepared using serial dilutions of these clones ( $10^0$  to  $10^6$  copies of viral genome per reaction). The genomic unit refers to one copy of the DNA-A of ToYSV or ToSRV. Standard curves were obtained by regression analysis of the Ct values of each of the three replicates of a given dilution in relation to the log of the amount of DNA in each dilution. For the absolute quantitation of the number of viral DNA molecules in the different treatments, 100 ng of total DNA from the infected plants was used in the qPCR reactions containing virus-specific primers. Each sample was analyzed in triplicate from at least two biological replicates.

**Physiological measurements of tomato transgenic lines.** Photosynthetic CO<sub>2</sub> assimilation (*A*), transpiration rate (*E*), and stomatal conductance (*g<sub>s</sub>*) measurements were performed with a portable open-flow gas exchange system (LICOR 6400, Li-COR, Lincoln, Nebraska, USA) under ambient CO<sub>2</sub> concentrations ( $370 \pm 10 \mu\text{mol mol}^{-1}$ ) and temperature conditions under artificial, saturating PAR ( $1,000 \mu\text{mol photons m}^{-2} \text{s}^{-1}$  at the leaf level).

**Estimation of total carotenoids, lycopene, and  $\beta$ -carotene.** Total carotenoids from fully ripened tomato fruits were extracted with cold acetone and petroleum ether, as described by Rodriguez-Amaya et al. (1976). The extract (30  $\mu\text{L}$ ) was separated by HPLC using reversed phase C18 column (Phenomenex Gemini, 250 x 4,6 mm, 5  $\mu\text{m}$ ) and a C18 guard column (Phenomenex ODS, 4 mm x 3 mm) on a Shimadzu, SCL 10AT VP HPLC system coupled to a DAD detector (Shimadzu, SPD-M10A) and operating at a flow rate of 1.7 mL/min. The mobile phase buffer used was methanol:ethyl acetate:acetonitrile (70:20:10, v/v/v). The chromatograms were obtained at 450 nm and integrated using the software Multi System Class Vp 6.12. Lycopene and  $\beta$ -carotene were quantified from HPLC profile



by using a purified lycopene standard (Sigma Chemical Co.) and a  $\beta$ -carotene standard purified from carrots.

## References

- Anders, S. and Huber, W. (2010) Differential Expression Analysis for Sequence Count Data. *Genome Biol.*, **11**, R106.
- Ashburner, M. C., Ball, J., Blake, J.A., Botstein, D., Butler, H., Cherry, J.M., Davis, A.P. Dolinski, K., Dwight, S.S., Eppig, J.T., Harris, M.A., Hill, D.P., Issel-Tarver, L., Kasarskis, A., Lewis, S., Matese, J.C., Richardson, J.E., Ringwald, M., Rubin, G.M. and Sherlock, G. (2000) Gene Ontology: Tool for the Unification of Biology. The Gene Ontology Consortium. *Nat. Genet.*, **25**, 25–29.
- Bullard, J.H., Purdom, E., Hansen, K.D. and Dudoit, S. (2010). Evaluation of Statistical Methods for Normalization and Differential Expression in mRNA-Seq Experiments. *BMC Bioinformatics*, **11**, 94.
- Cascardo JCM, Almeida RS, Buzeli RAA, Carolino SMB, Otoni WC and Fontes E.P.B. (2000) The phosphorylation state and expression of soybean BiP isoforms are differentially regulated following abiotic stresses. *J. Biol. Chem.*, **275**, 14494–14500.
- Costa, M.D.L., Reis, P.A.B., Valente, M.A.S., Irsigler, A.S.T., Carvalho, C.M., Loureiro, M.E., Aragão, F.J., Boston, R.S., Fietto, L.G. and Fontes, E.P.B. (2008) A new branch of endoplasmic reticulum-stress signaling and the osmotic signal converge on plant specific asparagine-rich proteins to promote cell death. *J. Biol. Chem.*, **283**, 20209–20219.
- Delú-Filho, N., Pirovani, C.P., Pedra, J.H.F., Matrangolo, F.S.V., Macêdo, J.N.A., Otoni, W.C. and Fontes, E.P.B. (2000) A sucrose binding protein homologue from soybean affects sucrose uptake in transgenic tobacco suspension-cultured cells. *Plant Physiol. Biochem.*, **38**, 353–361.
- Florentino, L.H., Santos, A.A., Fontenelle, M.R., Pinheiro, G.L., Zerbini, F.M., Baracat-Pereira, M.C. and Fontes, E.P.B. (2006) A PERK-like receptor kinase interacts with the geminivirus nuclear shuttle protein and potentiates viral infection. *J. Virol.*, **80**, 6648–6656.

- Hardcastle, T.J. and Krystyna, A.K. (2010) baySeq: Empirical Bayesian Methods for Identifying Differential Expression in Sequence Count Data. *BMC Bioinformatics*, **11**, 422.
- Langmead, B., Trapnell, C., Pop, M. and Salzberg, S.L. (2009) Ultrafast and memory-efficient alignment of short DNA sequences to the human genome. *Genome Biol.*, **10**, R25.
- Risso, D., Schwartz, K., Sherlock, G. and Dudoit, S. (2011) GC-Content Normalization for RNA-Seq Data. *BMC Bioinformatics*, **12**, 480.
- Robinson, M.D., McCarthy, D.J. and Smyth, G.K. (2010) edgeR: a Bioconductor package for differential expression analysis of digital gene expression data. *Bioinformatics* **26**, 139–140.
- Robinson, M.D. and Oshlack, A. (2010) A scaling normalization method for differential expression analysis of RNA-seq data. *Genome Biol.*, **11**, R25.
- Uhrig, J.F., Soellick, T.-R., Minke, C.J., Philipp, C., Kellmann, J.-W. and Schreier, P.H. (1999) Homotypic interaction and multimerization of nucleocapsid protein of tomato spotted wilt topovirus: identification and characterization of two interacting domains. *Proc. Natl Acad. Sci. USA* **96**, 55–60.
- Wang, W., Scali, M., Vignani, R., Spadafora, A., Sensi, E., Mazzuca, S. and Cresti, M. (2003) Protein extraction for two-dimensional electrophoresis from olive leaf, a plant tissue containing high levels of interfering compounds. *Electrophoresis* **24**, 2369–2375.
- Ward, JH. (1963). Hierarchical Grouping to Optimize an Objective Function. *J. Am. Stat. Assoc.*, **58**, 236–244.
- Yang, E.-W., Girke T., and Jiang T. (2013). Differential Gene Expression Analysis Using Coexpression and RNA-Seq Data. *Bioinformatics*, 29, 2153-2161.

# Supporting information - Figures S1-S6

## Sustained NIK-mediated antiviral signaling confers broad-spectrum tolerance to begomoviruses in cultivated plants

Otávio J.B.Brustolini <sup>a,b\*</sup>, Joao Paulo B. Machado <sup>a,b\*</sup>, Jorge A. Condori-Apfata <sup>b</sup>, Daniela Coco <sup>a,b</sup>, Michihito Deguchi <sup>a,b</sup>, Virgílio A. P. Loriato <sup>a,b</sup>, Welison A. Pereira, Poliana Alfenas-Zerbini <sup>b</sup>, Francisco M. Zerbini <sup>b</sup>, Alice K. Inoue-Nagata <sup>b,d</sup>, Anesia A. Santos <sup>a,b</sup>, Joanne Chory <sup>e</sup>, Fabyano F. Silva <sup>c</sup>, Elizabeth P.B. Fontes <sup>a,b,&</sup>

<sup>a</sup>Departamento de Bioquímica e Biologia Molecular <sup>b</sup>National Institute of Science and Technology in Plant-Pest Interactions, Bioagro, <sup>c</sup>Departamento de Zootecnia, Universidade Federal de Viçosa, 36570.000, Viçosa, MG, Brazil. <sup>d</sup>Embrapa Vegetables, Brasília, DF 70359-970, Brazil. <sup>e</sup>Howard Hughes Medical Institute and Plant Biology Laboratory, The Salk Institute for Biological Studies, La Jolla, California 92037, USA

\*These authors contributed equally to this work

&For correspondence:

Elizabeth B. P. Fontes, Departamento de Bioquímica e Biologia Molecular/Bioagro, National Institute of Science and Technology in Plant-Pest Interactions, Universidade Federal de Viçosa, 36570.000, Viçosa, MG, Brazil, phone +55 31 3899 2948 &email

[bbfontes@ufv.br](mailto:bbfontes@ufv.br)

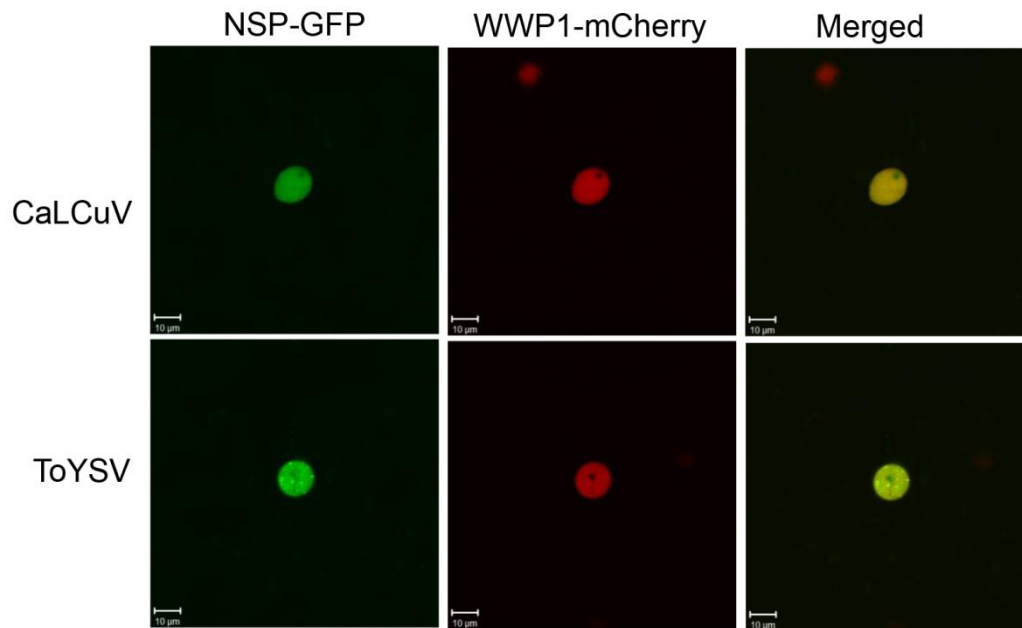

**Figure S1. NSP from CaLCuV and ToYSV concentrates in the nucleus when ectopically expressed in *N. benthamiana* leaves.** *N. benthamiana* leaves were co-infiltrated with *A. tumefaciens* carrying a 35S::NSP-GFP construct from CaLCuV or ToYSV together with a 35S::AtWWP1-mCherry construct. After 48 h post-infiltration, the subcellular localizations of the fluorescent fusion proteins were examined by confocal microscopy.

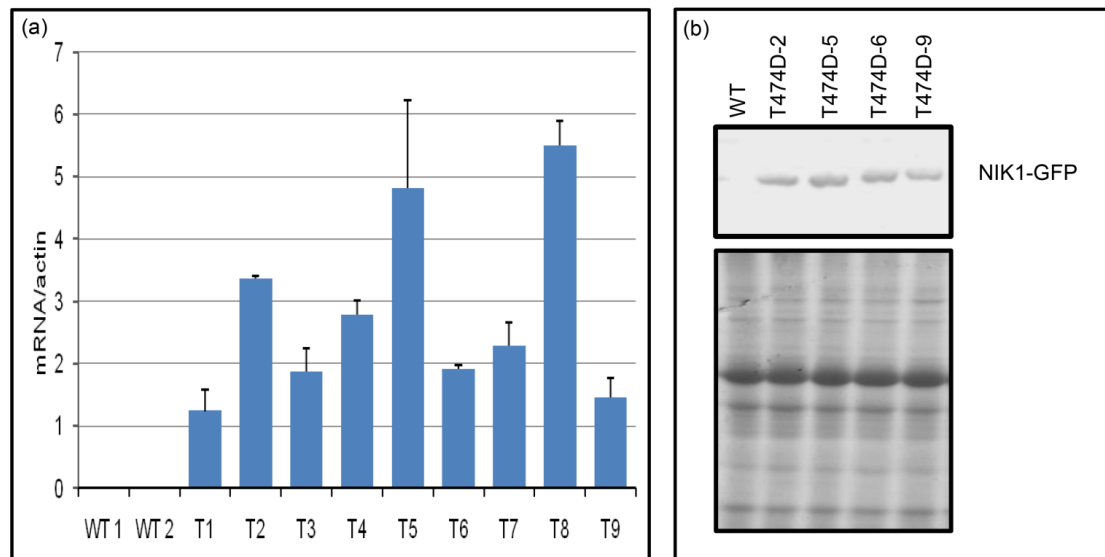

**Figure S2. Overexpression of T474D mutant receptor in tomato leaves.**

**(a)** T474D transcript accumulation in primary transformants. The expression of T474D in the leaves of several independent transgenic lines was monitored by quantitative RT-PCR. Values of expression were calculated using the  $2^{-\Delta Ct}$  method with actin as an endogenous control. Values represent the mean  $\pm$  SD of three replicates. **(b)** Accumulation of T474D-GFP in transgenic lines. Total protein was extracted from the leaves of independent transgenic lines (as indicated), fractionated by SDS-PAGE (bottom) and immunoblotted with an anti-GFP antiserum.

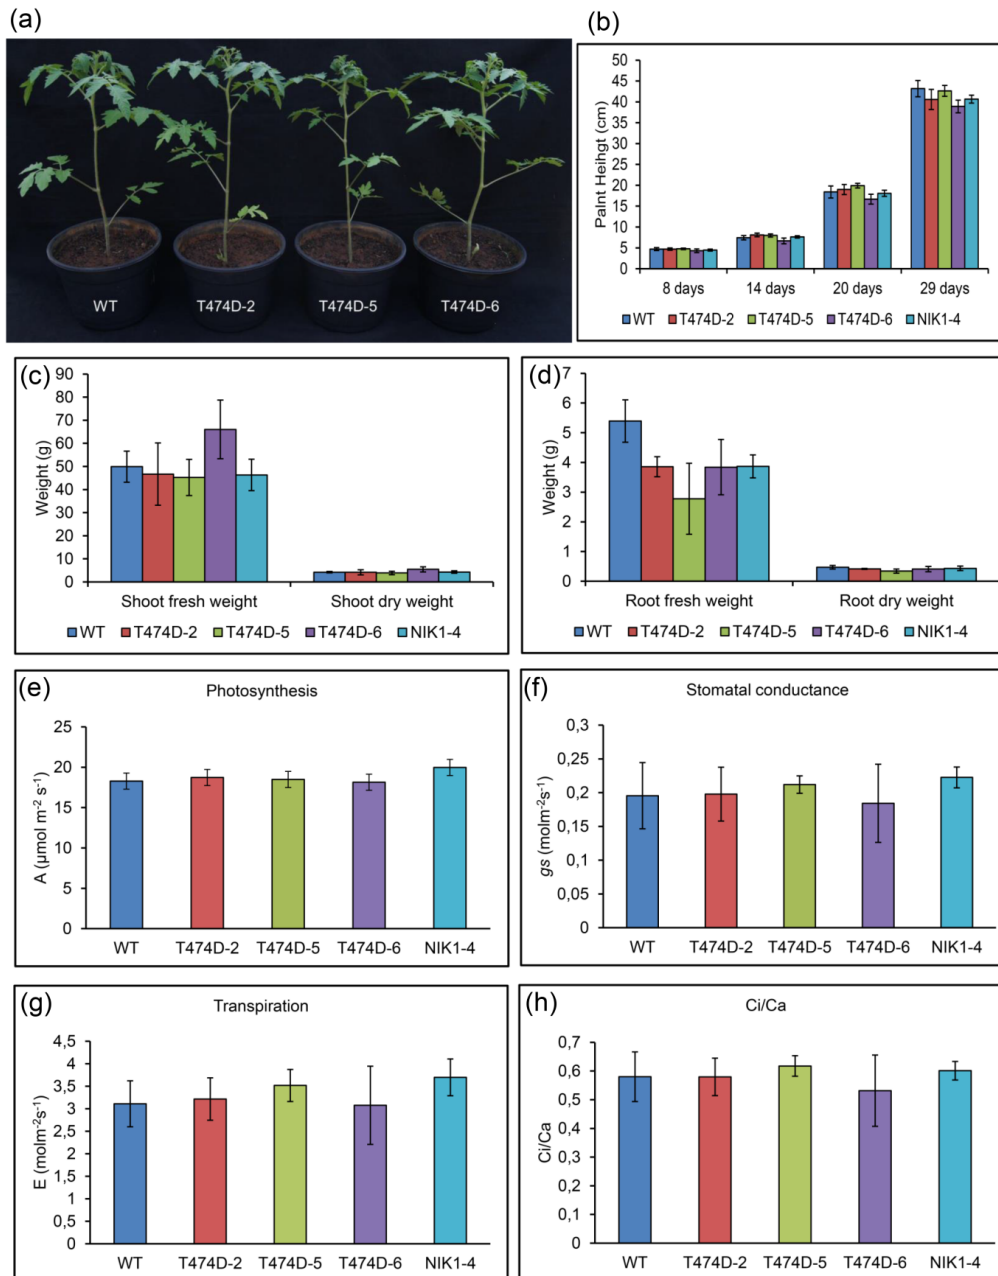

**Figure S3. Characterization of the T474D-overexpressing lines during the vegetative phase.**

(a), (b), (c) and (d) Developmental phenotypes associated with overexpression of the T474D gain-of-function mutant in the R3 generation of tomato transgenic lines. (a) The images are plants of T474D-2, T474D-5, T474D-6 and wild-type lines grown for 30 days under normal greenhouse conditions. The transgenic lines are visibly undistinguishable from the wild-type plant. The indicated day correspond to the period of time after transferring germinated seedlings to the soil. (b) Plant height of wild-type line and T474D-2, T474D-5, T474D-6 and NIK1-4 transgenic lines grown for 8, 14, 20 or 29 days in the greenhouse. The indicated days correspond to the period of time after transferring germinated seedlings to the soil. Values represent the mean  $\pm$  IC ( $\alpha=0,05$ ) of 11 biological replicates and did not differ between wild-type and transgenic lines in each period of the measurement. (c) Shoot fresh and dry weight and (d) root fresh and dry weight of wild-type and transgenic lines (as indicated) grown for 30 days in greenhouse. Values represent the mean  $\pm$  IC ( $\alpha=0,05$ ) of three biological replicates. (e-h) Physiological measurements of transgenic lines. The net  $\text{CO}_2$  assimilation rate ( $A$ ), transpiration rate ( $E$ ), stomatal conductance to water vapor ( $g_s$ ) and internal-to-ambient  $\text{CO}_2$  concentration ratio ( $C_i/C_a$ ) of fully expanded leaves of wild-type, T474D-2, T474D-5 and T474D-6 transgenic lines were measured by the LI-6400 infrared (IR) gas analyzer at growth irradiance. The error bars represent the confidence interval ( $\alpha = 0.05$ ) of measurements from five individual plants.

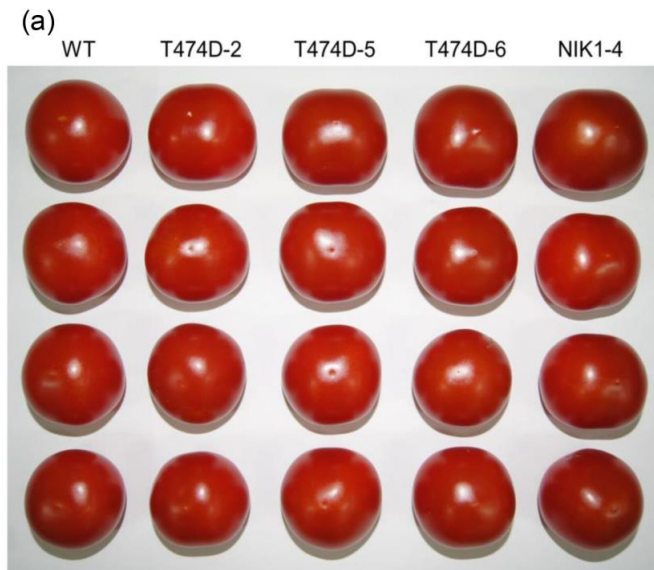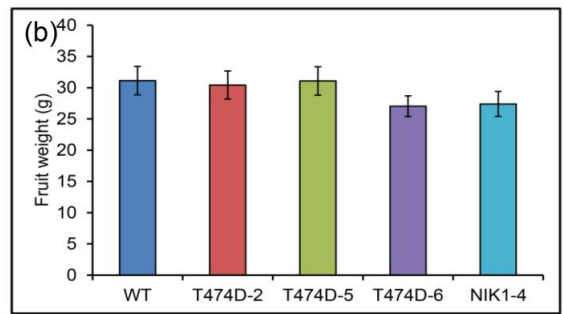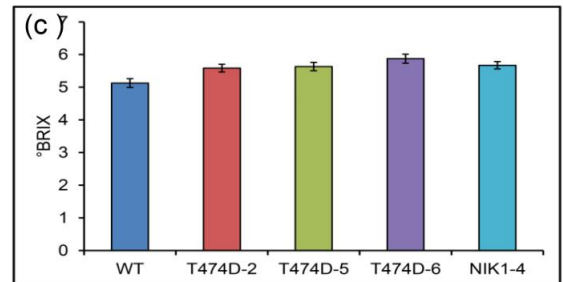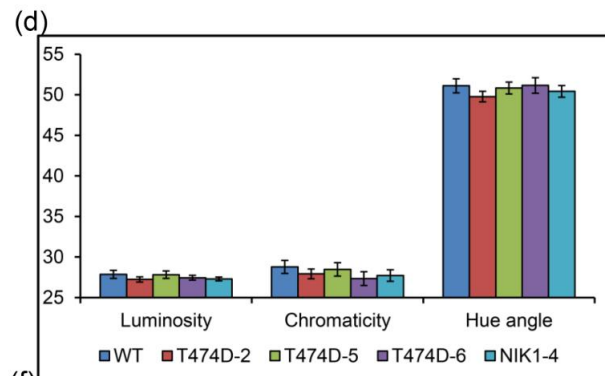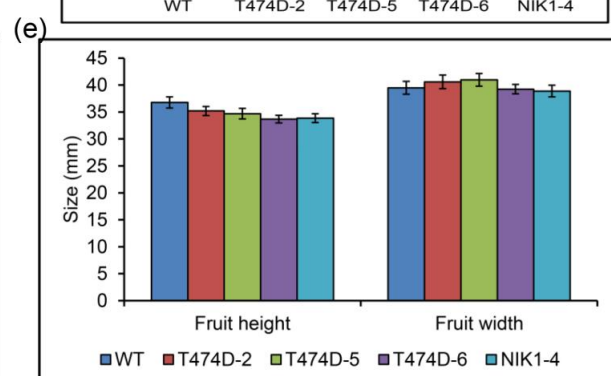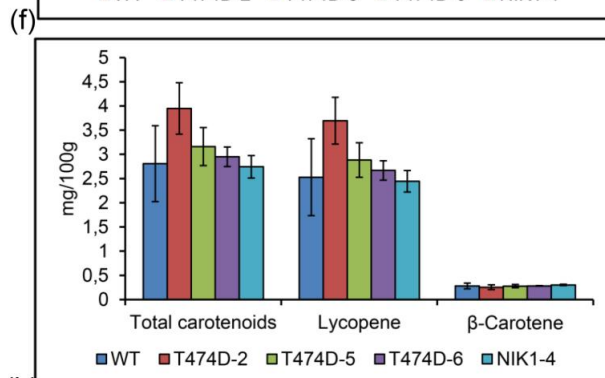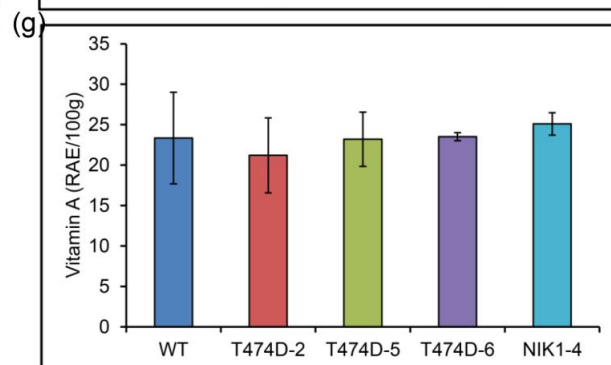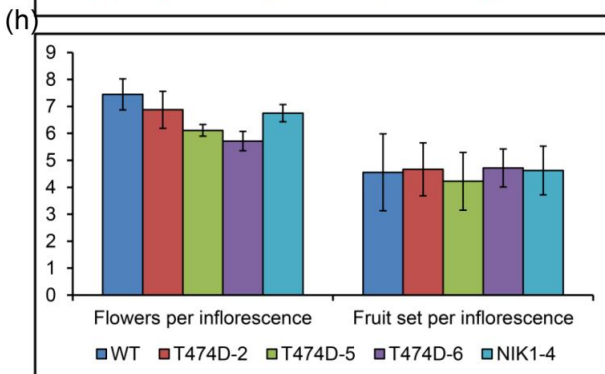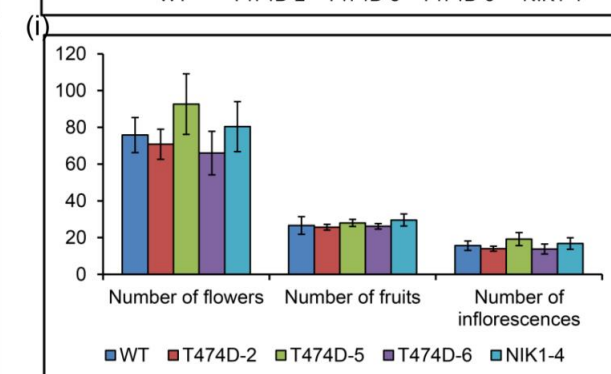

**Figure S4. Fruit quality and yield of the T474D-overexpressing lines** (a) Morphology and color of fresh ripe tomato fruits from T474D-overexpressing lines. The ripe fruit of the transgenic lines were bright red and were classified as small round, varying in size as indicated in the figure. (b) Fruit weight. Error bars, 95% confidence intervals (n=5) based on bootstrap resampling replicates from 160 fruits. (c) Content of soluble solids of tomato fruits from T474D-, NIK1-overexpressing lines and wild-type. Fully ripened tomato fruits were also analyzed for total soluble solids (TSS), which were not different between the transgenic lines and wild-type. Total soluble solids were determined using a manual refractometer model ATC103 (BIOBRIX). The tomato sample was squashed manually and about three or four drops were transferred to the refractometer. Results were expressed as degrees of Brix. Error bars, 95% confidence intervals (n=3) based on bootstrap resampling replicates from 85 fruits. (d) Skin color of tomato fruits. Skin coloration was analyzed according to luminosity (*L*), chromaticity (*C*) and hue angle (*H*) parameters (two readings per fruit), by means of reflectometry in a colorimeter brand KONICA MINOLTA. Values represent the mean  $\pm$  IC ( $\alpha=0,05$ ) of 53 fruits. (e) Fruit Size. Fully ripened tomato fruits were also analyzed for size. Values represent the mean  $\pm$  IC ( $\alpha=0,05$ ) of 160 fruits. (f) Content of carotenoids. Total carotenoids, lycopene and  $\beta$ -carotene were determined by HPLC. Values represent the mean  $\pm$  IC ( $\alpha=0,05$ , n=3) from three biological replicates. (g) Vitamin A content. The vitamin A content is expressed as recommended by the Institute of Medicine (2001), in which 1 retinol activity equivalent (RAE) corresponds to 1  $\mu\text{g}$  of retinol, 12  $\mu\text{g}$  of  $\beta$ -carotene and 24  $\mu\text{g}$  of other pro-vitamin carotenoids. Values represent the mean  $\pm$  IC ( $\alpha=0,05$ , n=3) from three biological replicates. (h) and (i). Developmental and yield performance of wild type and transgenic lines. The number of days to flowering (30-31 days) did not differ among transgenic lines and wild-type control. The number and size of inflorescence as well as fruit yield were measured. Values represent the mean  $\pm$  IC ( $\alpha=0,05$ ) of seven biological replicates.

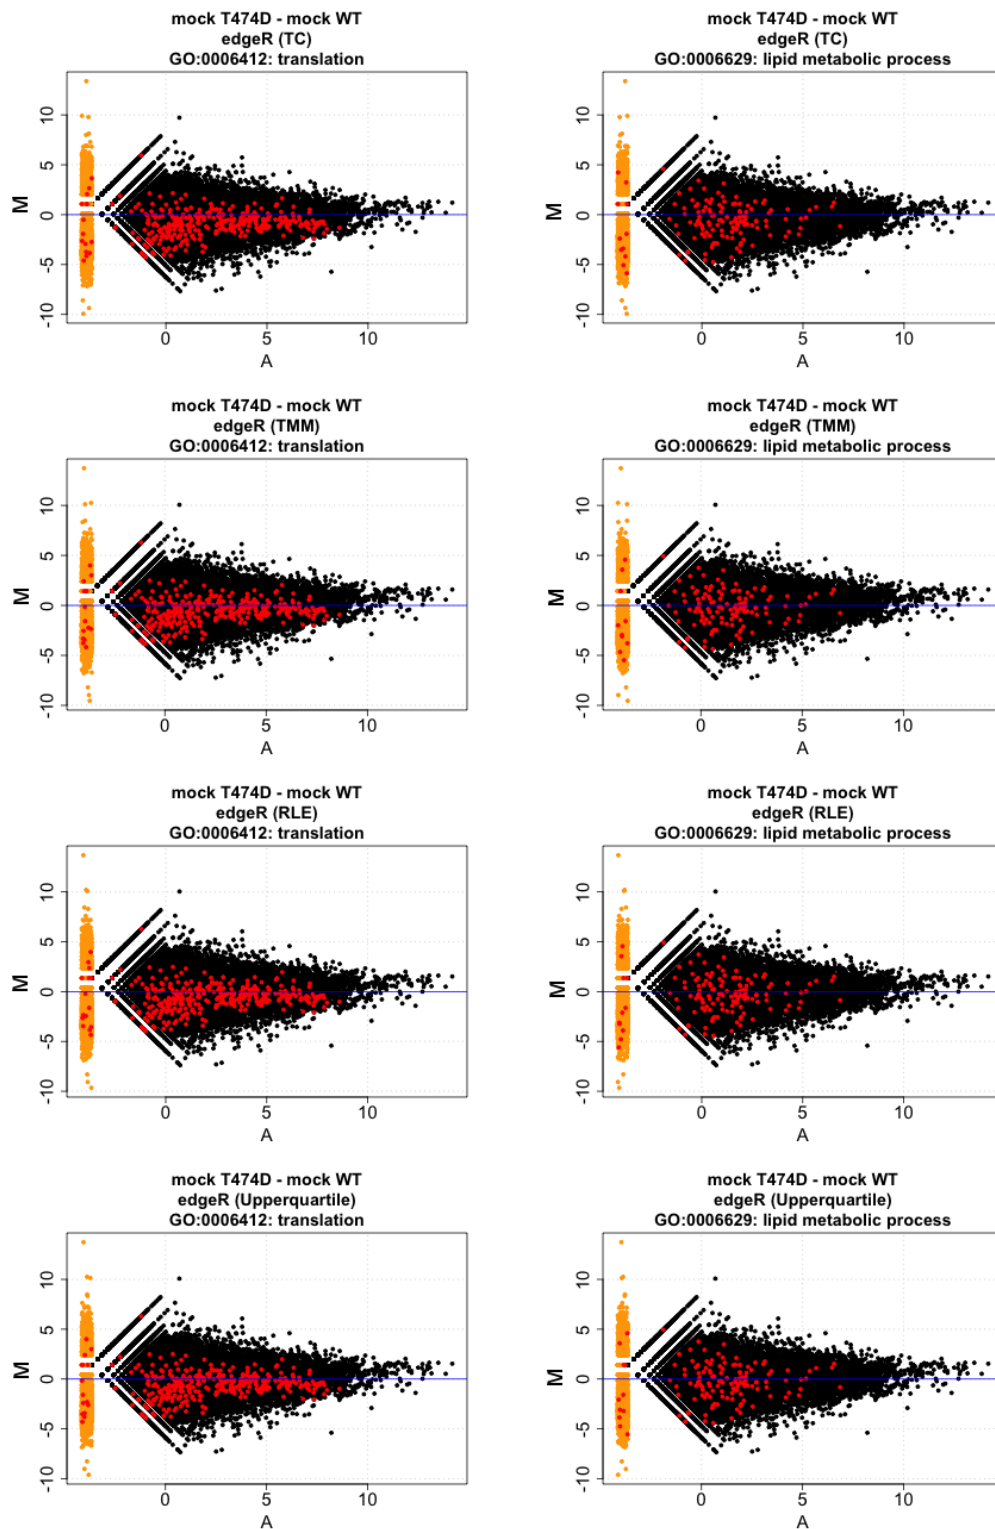

**Figure S5. Representation of the translational machinery-related genes in the down-regulated changes.** The 'MA' plots show the log of the ratio of expression levels against log-concentration, and each dot represents a gene. These plots are from the contrast mock T474D-mock WT and the normalization method used is shown on the top of the plots. The smear of points on the left side indicates genes that were observed in only one group of replicated samples, and the red points denote the translation related genes (GO:0006412) or lipid metabolic process-related genes (GO:0006629). For the translation related genes, the density of the red dots is concentrated below zero, whereas for the lipid metabolic process-related genes, the red dots are spread to the overall dispersion.



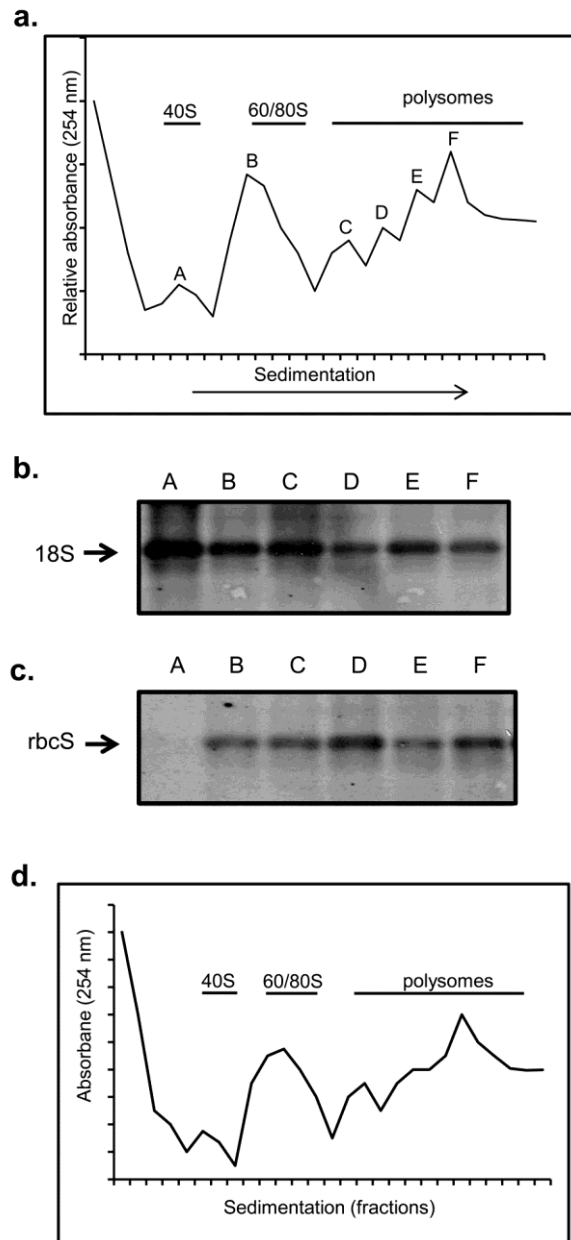

**Figure S6. Isolation of polysomal fractions from tomato seedlings.**

(a) UV absorbance profiles of the sucrose gradient used for RNA fractionation from infected T474D-overexpressing lines. Polysomes from infected T474D-overexpressing lines at 10 DPI were fractionated on a sucrose gradient, and the fractions were manually collected. (b) Distribution of 18S rRNA on the sucrose gradient. Total RNA from the fractions, as indicated in A by the letters, was extracted with phenol/chloroform/isoamyl alcohol, precipitated with isopropanol, blotted and probed with 18S rDNA. The result indicates the distribution of the 40S small subunit. The higher concentration of 18S in fraction A indicates a 40S-enriched fraction. The heavier fractions are monosomes (RNPs) and polysomes. (c) Levels of *rbcS* mRNA per fraction. The levels of the small subunit of rubisco (*rbcS*) mRNA were examined by northern blotting. This control was used to ensure the quality and distribution of a specific mRNA. (d) UV absorbance profiles of the sucrose gradient used for RNA fractionation of the infected wild type leaves at 10 DPI. Polysomes from wild type leaves at 10 DPI were isolated as in (a). The pooled fractions were used for RNA extraction and for the amplification of specific resistance-like gene transcripts. The bars indicate actin and *rbcS* transcripts.

Table S1. Enriched biological process categories from the GO database using the GSEA\* method

| <b>Infected WT – mock WT (UP-regulated)</b>          |                                                                                                                                          |              |                        |
|------------------------------------------------------|------------------------------------------------------------------------------------------------------------------------------------------|--------------|------------------------|
| <b>Enriched Categories</b>                           | <b>DGE** methods: number of genes / number of genes in the GO group (p-value)</b>                                                        | <b>AN***</b> | <b>Average p-value</b> |
| GO:0006073:<br>cellular glucan metabolic process     | edgeR/RLE: 4/93 (0.007615) edgeR/upper: 4/93 (0.008759) baySeq: 7/93 (0.006532)                                                          | 5            | 0.007635               |
| GO:0009765:<br>photosynthesis, light harvesting      | edgeR/RLE: 3/33 (0.002581) edgeR/upper: 3/33 (0.002895) baySeq: 4/33 (0.007371)                                                          | 3            | 0.004282               |
| <b>Infected WT – mock WT (DOWN-regulated)</b>        |                                                                                                                                          |              |                        |
| <b>Enriched Categories</b>                           | <b>DGE methods: number of genes / number of genes in the GO group (p-value)</b>                                                          | <b>AN</b>    | <b>Average p-value</b> |
| GO:0006629:<br>lipid metabolic process               | edgeR/TMM: 19/592 (1.79e-05) edgeR/TC: 22/592 (0.0004238) edgeR/RLE: 16/592 (8.847e-05) edgeR/upper: 7/343 (0.009761)                    | 16           | 1.77E-04               |
| GO:0006633:<br>fatty acid biosynthetic process       | edgeR/TMM: 5/69 (0.00087) edgeR/TC: 5/69 (0.006144) edgeR/RLE: 5/69 (0.0004101) edgeR/upper: 5/69 (0.001461) DESeq: 2/69 (0.006187)      | 5            | 0.00275                |
| GO:0009611:<br>response to wounding                  | edgeR/TMM: 5/22 (3.054e-06) edgeR/TC: 5/22 (2.732e-05) edgeR/RLE: 5/22 (1.351e-06) edgeR/upper: 5/22 (4.486e-07) DESeq: 3/22 (6.617e-06) | 5            | 7.76E-06               |
| GO:0032787:<br>monocarboxylic acid metabolic process | edgeR/TMM: 5/96 (0.003758) edgeR/RLE: 5/96 (0.001836) edgeR/upper: 5/96 (0.000681)                                                       | 5            | 0.002091               |
| GO:0044283:<br>small molecule biosynthetic process   | edgeR/TMM: 8/217 (0.002388) edgeR/RLE: 7/217 (0.003716) edgeR/upper: 7/217 (0.001046)                                                    | 7            | 0.002383               |
| GO:0046394:<br>carboxylic acid biosynthetic process  | edgeR/TMM: 8/189 (0.0009954) edgeR/RLE: 7/189 (0.001713) edgeR/upper: 7/189 (0.000462)                                                   | 7            | 0.0010568              |
| GO:0055114:<br>oxidation-reduction process           | edgeR/TMM: 29/1645 (0.004426) edgeR/RLE: 25/1645 (0.00631) edgeR/upper: 21/1645 (0.006762)                                               | 25           | 0.005833               |
| <b>Mock NIK-OX – mock WT (UP-regulated)</b>          |                                                                                                                                          |              |                        |
| <b>Enriched Categories</b>                           | <b>DGE methods: number of genes / number of genes in the GO group (p-value)</b>                                                          | <b>AN</b>    |                        |
| GO:0046148:<br>pigment biosynthetic process          | edgeR/TMM: 3/28 (0.006671) edgeR/TC: 3/28 (0.004615) edgeR/RLE: 3/28 (0.0075) edgeR/upper: 3/28 (0.003001)                               | 3            | 0.0038946              |
| <b>Mock NIK-OX – mock WT (DOWN-regulated)</b>        |                                                                                                                                          |              |                        |
| <b>Enriched Categories</b>                           | <b>DGE methods: number of genes / number of genes in the GO group (p-value)</b>                                                          | <b>AN</b>    | <b>Average p-value</b> |
| GO:0009611:<br>response to wounding                  | edgeR/TMM: 3/22 (0.001621) edgeR/TC: 3/22 (0.003048) edgeR/RLE: 3/22 (0.001937) edgeR/upper: 3/22 (0.002832)                             | 3            | 0.0023595              |
| GO:0043648:<br>dicarboxylic acid metabolic process   | edgeR/TMM: 3/27 (0.002961) edgeR/TC: 3/27 (0.005512) edgeR/RLE: 3/27 (0.003528) edgeR/upper: 3/27 (0.005128)                             | 3            | 0.0042822              |
| GO:0044262:<br>cellular carbohydrate                 | edgeR/TMM: 7/214 (0.00841) edgeR/TC: 8/214 (0.00833) edgeR/upper: 8/214 (0.007165)                                                       | 8            | 0.007968               |

| metabolic process                                               |                                                                                                                                                       |           |                        |
|-----------------------------------------------------------------|-------------------------------------------------------------------------------------------------------------------------------------------------------|-----------|------------------------|
| <b>Mock T474D – mock WT (UP-regulated)</b>                      |                                                                                                                                                       |           |                        |
| <i>Enriched Categories</i>                                      | <i>DGE methods: number of genes / number of genes in the GO group (p-value)</i>                                                                       | <i>AN</i> | <i>Average p-value</i> |
| GO:0006629:<br>lipid metabolic process                          | edgeR/TMM: 47/592 (0.007967) edgeR/RLE: 46/592 (0.003633)<br>edgeR/upper: 45/592 (0.007517) baySeq: 45/343 (5.446e-06)                                | 46        | 0.00478                |
| GO:0009765:<br>photosynthesis, light harvesting                 | edgeR/TMM: 6/33 (0.008713) edgeR/upper: 6/33 (0.006678) DESeq: 5/33 (0.005769) baySeq: 8/33 (0.001161)                                                | 7         | 0.00558                |
| GO:0009607:<br>response to biotic stimulus                      | edgeR/TMM: 9/58 (0.009423) edgeR/upper: 8/58 (0.007652) baySeq: 10/58 (0.004553)                                                                      | 9         | 0.007209               |
| GO:0044283:<br>small molecule biosynthetic process              | edgeR/TMM: 21/217 (0.009161) edgeR/RLE: 20/217 (0.008819)<br>edgeR/upper: 21/217 (0.004946)                                                           | 21        | 0.007642               |
| GO:0051247:<br>positive regulation of protein metabolic process | edgeR/TMM: 3/7 (0.00502) edgeR/RLE: 3/7 (0.004125) edgeR/upper: 3/7 (0.004283)                                                                        | 3         | 0.004476               |
| <b>Mock T474D – mock WT (DOWN-regulated)</b>                    |                                                                                                                                                       |           |                        |
| <i>Enriched Categories</i>                                      | <i>DGE methods: number of genes / number of genes in the GO group (p-value)</i>                                                                       | <i>AN</i> | <i>Average p-value</i> |
| GO:0006260:<br>DNA replication                                  | edgeR/TMM: 12/87 (0.001556) edgeR/RLE: 12/87 (0.003899)<br>edgeR/upper: 12/87 (0.00235)                                                               | 12        | 0.0026                 |
| GO:0006270:<br>DNA replication initiation                       | edgeR/TMM: 2/2 (0.002646) edgeR/TC: 2/2 (0.007579) edgeR/RLE: 2/2 (0.003304) edgeR/upper: 2/2 (0.002919)                                              | 2         | 0.004112               |
| GO:0006275:<br>regulation of DNA replication                    | edgeR/TMM: 2/2 (0.002646) edgeR/TC: 2/2 (0.007579) edgeR/RLE: 2/2 (0.003304) edgeR/upper: 2/2 (0.002919) DESeq: 2/2 (0.00171)                         | 2         | 0.00363                |
| GO:0006323:<br>DNA packaging                                    | edgeR/TMM: 12/77 (0.0005285) edgeR/RLE: 12/77 (0.001394)<br>edgeR/upper: 12/77 (0.0008159)                                                            | 12        | 0.004509               |
| GO:0006333:<br>chromatin assembly or disassembly                | edgeR/TMM: 12/80 (0.0007529) edgeR/TC: 15/80 (0.003447)<br>edgeR/RLE: 12/80 (0.001953) edgeR/upper: 12/80 (0.001154)                                  | 13        | 0.001826               |
| GO:0006334:<br>nucleosome assembly                              | edgeR/TMM: 12/77 (0.0005285) edgeR/RLE: 12/77 (0.001394)<br>edgeR/upper: 12/77 (0.0008159)                                                            | 12        | 0.000913               |
| GO:0006412:<br>translation                                      | edgeR/TMM: 53/579 (2.923e-05) edgeR/TC: 110/579 (1.131e-15)<br>edgeR/RLE: 67/579 (2.465e-08) edgeR/upper: 59/579 (1.62e-06) DESeq: 51/579 (2.342e-07) | 68        | 4.69E-07               |
| GO:0006629:<br>lipid metabolic process                          | edgeR/TMM: 56/592 (6.552e-06) edgeR/TC: 82/592 (1.355e-05)<br>edgeR/RLE: 61/592 (5.595e-06) edgeR/upper: 58/592 (6.822e-06) DESeq: 43/592 (0.0002239) | 60        | 0.000645               |
| GO:0007018:<br>microtubule-based movement                       | edgeR/TMM: 14/60 (1.519e-06) edgeR/TC: 19/60 (3.965e-07)<br>edgeR/RLE: 16/60 (1.667e-07) edgeR/upper: 15/60 (4.582e-07) DESeq: 11/60 (2.969e-05)      | 15        | 4.07E-04               |
| GO:0009059:<br>macromolecule biosynthetic process               | edgeR/TC: 250/2200 (1.178e-06) edgeR/RLE: 156/2200 (0.00198)<br>edgeR/upper: 145/2200 (0.004376)                                                      | 184       | 6.45E-03               |
| GO:0009611:<br>response to wounding                             | edgeR/TMM: 7/22 (8.009e-05) edgeR/TC: 7/22 (0.001975) edgeR/RLE: 7/22 (0.0001609) edgeR/upper: 7/22 (0.0001092) DESeq: 7/22 (1.977e-05)               | 7         | 0.00251                |
| GO:0009765:<br>photosynthesis,                                  | edgeR/TMM: 9/33 (3.03e-05) edgeR/TC: 9/33 (0.001575) edgeR/RLE: 9/33 (7.225e-05) edgeR/upper: 9/33 (4.459e-05) DESeq: 9/33 (5.25e-06)                 | 9         | 0.00237                |

|                                                                       |                                                                                                                                  |     |          |
|-----------------------------------------------------------------------|----------------------------------------------------------------------------------------------------------------------------------|-----|----------|
| light harvesting                                                      |                                                                                                                                  |     |          |
| GO:0015995:<br>chlorophyll<br>biosynthetic<br>process                 | edgeR/TMM: 4/13 (0.003425) edgeR/RLE: 4/13 (0.005109) edgeR/upper:<br>4/13 (0.00409)                                             | 4   | 0.000421 |
| GO:0022607:<br>cellular<br>component<br>assembly                      | edgeR/TMM: 17/153 (0.002249) edgeR/RLE: 17/153 (0.006862)<br>edgeR/upper: 17/153 (0.003725)                                      | 17  | 0.00428  |
| GO:0034622:<br>cellular<br>macromolecular<br>complex<br>assembly      | edgeR/TMM: 17/131 (0.0003895) edgeR/TC: 21/131 (0.004471)<br>edgeR/RLE: 17/131 (0.001345) edgeR/upper: 17/131 (0.0006802)        | 18  | 0.001721 |
| GO:0044249:<br>cellular<br>biosynthetic<br>process                    | edgeR/TMM: 163/2634 (0.004014) edgeR/TC: 296/2634 (2.09e-07)<br>edgeR/RLE: 187/2634 (0.0005531) edgeR/upper: 172/2634 (0.002566) | 205 | 0.00178  |
| GO:0071824:<br>protein-DNA<br>complex subunit<br>organization         | edgeR/TMM: 12/77 (0.0005285) edgeR/RLE: 12/77 (0.001394)<br>edgeR/upper: 12/77 (0.0008159)                                       | 12  | 9,13E-04 |
| GO:0071840:<br>cellular<br>component<br>organization or<br>biogenesis | edgeR/TMM: 39/488 (0.004133) edgeR/TC: 62/488 (0.001511)<br>edgeR/RLE: 42/488 (0.005659) edgeR/upper: 40/488 (0.005529)          | 46  | 0.00421  |
| GO:1901576:<br>organic substance<br>biosynthetic<br>process           | edgeR/TMM: 173/2717 (0.0007624) edgeR/TC: 60/517 (0.002539)<br>edgeR/RLE: 43/517 (0.003325) DESeq: 139/2717 (0.002492)           | 104 | 0.00228  |

\*GSEA - Gene set enrichment analysis

\*\*DGE – Differential gene expression

\*\*\*AN – Average number

Table S2. Resistance protein-related genes differentially expressed in infected T474D (infected T474D-mock T474D)

| <b>Up-regulated resistance protein-related genes</b>   |               |                |                                  |                                                                      |
|--------------------------------------------------------|---------------|----------------|----------------------------------|----------------------------------------------------------------------|
| <b>ITAG</b>                                            | <b>LOG2FC</b> | <b>Q-VALUE</b> | <b>GO</b>                        | <b>DESCRIPTION</b>                                                   |
| Solyc02g032050.1.1                                     | 1.620578758   | 0.040756495    |                                  | Disease resistance-responsive (dirigent-like protein) family protein |
| Solyc05g042090.1.1                                     | 4.907459511   | 5.24E-06       | GO:0043531,GO:0006915,GO:0005524 | NB-ARC domain-containing disease resistance protein                  |
| Solyc07g008590.1.1                                     | 1.572643749   | 0.005472267    | GO:0005515                       | disease resistance family protein / LRR family protein               |
| Solyc07g008620.1.1                                     | 2.208276596   | 2.04E-06       | GO:0005515                       | disease resistance family protein / LRR family protein               |
| Solyc08g081780.1.1                                     | 1.470947445   | 0.002867545    |                                  | Disease resistance-responsive (dirigent-like protein) family protein |
| Solyc12g044190.1.1                                     | 3.942547883   | 1.63E-12       | GO:0043531,GO:0006915,GO:0005524 | LRR and NB-ARC domains-containing disease resistance protein         |
| Solyc12g097010.1.1                                     | 1.982314928   | 0.001087781    | GO:0005515                       | disease resistance protein (TIR-NBS-LRR class), putative             |
| <b>Down-regulated resistance protein-related genes</b> |               |                |                                  |                                                                      |
| <b>ITAG</b>                                            | <b>LOG2FC</b> | <b>Q-VALUE</b> | <b>GO</b>                        | <b>DESCRIPTION</b>                                                   |
| Solyc05g054340.2.1                                     | -1.752069826  | 0.000112318    | GO:0043531,GO:0006915,GO:0005524 | NB-ARC domain-containing disease resistance protein                  |
| Solyc07g061940.2.1                                     | -1.119795309  | 4.23E-03       | GO:0000287,GO:0030976,GO:0003824 | chlorsulfuron/imidazolinone resistant 1                              |

| Table S3. Gene Enrichment Analysis*                    |       |                     |          |                   |          |
|--------------------------------------------------------|-------|---------------------|----------|-------------------|----------|
| (edgeR TMM T474D infected – T474D mock)                |       |                     |          |                   |          |
| Biological Process                                     | Total | Downregulated genes | P-value  | Upregulated genes | P-value2 |
| ITAG 2.3 (Number of genes)                             | 34727 | 758                 |          | 1115              |          |
| Response to Salicylic Acid (GO:0009751)                | 404   | 6                   | 0.87703  | 9                 | 0.903966 |
| Defense response to pathogen (GO:0042742 + GO:0050832) | 1038  | 14                  | 0.981838 | 36                | 0.34073  |
| Defense response to virus (GO:0051607)                 | 115   | 1                   | 0.921305 | 2                 | 0.887503 |
| Virus induced gene silencing (GO:0009616)              | 198   | 1                   | 0.987503 | 6                 | 0.613786 |
| Resistance like proteins                               | 450   | 2                   | 9.99E-01 | 7                 | 0.990446 |
|                                                        |       |                     |          |                   |          |

\* Data were retrieved from <http://amigo.geneontology.org/amigo/term/GO:0009607> (Reponse to biotic stress GO:0009607). These groups are presented at : Source ITAG 2.3

\*\* Statistical test based on hypergeometric distribution probability with significance of < 0.01

## Response to Salicylic Acid (GO:0009751)

Up-regulated genes:

9

| <i>ITAG</i>        | <i>log2FC</i> | <i>q-value</i> | <i>Functional Description</i>                                           |
|--------------------|---------------|----------------|-------------------------------------------------------------------------|
| Solyc10g008930.1.1 | 5.415038      | 1.99E-09       | Thioredoxin superfamily protein                                         |
| Solyc09g006010.2.1 | 1.60671       | 0.016183       | pathogenesis-related gene 1                                             |
| Solyc03g044710.2.1 | 3.150635      | 0.000397       | phospholipase A 2A                                                      |
| Solyc12g009770.1.1 | 1.685177      | 0.049657       | receptor like protein 33                                                |
| Solyc09g074270.2.1 | 2.016299      | 0.040922       | alpha/beta-Hydrolases superfamily protein                               |
| Solyc03g095770.2.1 | 1.483342      | 2.15E-05       | WRKY DNA-binding protein 70                                             |
| Solyc08g062930.1.1 | 1.371314      | 0.040922       | calmodulin-binding family protein                                       |
| Solyc12g008960.1.1 | 2.706816      | 0.01327        | calmodulin-binding family protein                                       |
| Solyc06g073080.2.1 | 4.773136      | 0.013878       | 2-oxoglutarate (2OG) and Fe(II)-dependent oxygenase superfamily protein |

Down-regulated genes:

6

| <i>ITAG</i>        | <i>log2FC</i> | <i>q-value</i> | <i>Functional Description</i>                                 |
|--------------------|---------------|----------------|---------------------------------------------------------------|
| Solyc07g044860.2.1 | -1.773859     | 0.022822       | photosystem II subunit P-1                                    |
| Solyc04g076280.2.1 | -1.483044     | 0.000125       | K-box region and MADS-box transcription factor family protein |
| Solyc06g066370.2.1 | -1.151764     | 0.003015       | WRKY DNA-binding protein 33                                   |
| Solyc04g079240.2.1 | -2.216969     | 0.015538       | phospholipase A 2A                                            |
| Solyc02g065400.2.1 | -1.336943     | 0.023129       | photosystem II subunit O-2                                    |
| Solyc11g072540.1.1 | -1.239099     | 0.005653       | Transducin/WD40 repeat-like superfamily protein               |

## Defense response to pathogen (GO:0042742 + GO:0050832)

Up-regulated genes:

36

| <i>ITAG</i>        | <i>log2FC</i> | <i>q-value</i> | <i>Functional Description</i>      |
|--------------------|---------------|----------------|------------------------------------|
| Solyc01g088400.2.1 | 2.55705       | 2.19E-08       | Fatty acid hydroxylase superfamily |
| Solyc10g008930.1.1 | 5.415038      | 1.99E-09       | Thioredoxin superfamily protein    |
| Solyc08g082850.2.1 | 1.300149      | 0.001843       | general control non-repressible 3  |
| Solyc11g022590.1.1 | 4.206634      | 3.18E-30       | kunitz trypsin inhibitor 1         |
| Solyc09g006010.2.1 | 1.60671       | 0.016183       | pathogenesis-related gene 1        |
| Solyc03g044710.2.1 | 3.150635      | 0.000397       | phospholipase A 2A                 |

|                    |          |                                                                                    |
|--------------------|----------|------------------------------------------------------------------------------------|
| Solyc03g122140.2.1 | 2.157982 | 0.024809 Aldolase-type TIM barrel family protein                                   |
| Solyc01g006320.2.1 | 2.558596 | 0.014784 Late embryogenesis abundant (LEA) hydroxyproline-rich glycoprotein family |
| Solyc06g074030.1.1 | 2.07484  | 7.25E-05 Polynucleotidyl transferase, ribonuclease H-like superfamily protein      |
| Solyc06g084090.2.1 | 4.159211 | 0.002042 histone H2A 11                                                            |
| Solyc03g095770.2.1 | 1.483342 | 2.15E-05 WRKY DNA-binding protein 70                                               |
| Solyc09g092580.2.1 | 6.39079  | 7.31E-05 cytochrome P450, family 83, subfamily B, polypeptide 1                    |
| Solyc12g096520.1.1 | 2.734469 | 0.013099 HOPW1-1-interacting 2                                                     |
| Solyc08g062930.1.1 | 1.371314 | 0.040922 calmodulin-binding family protein                                         |
| Solyc12g008960.1.1 | 2.706816 | 0.01327 calmodulin-binding family protein                                          |
| Solyc07g066470.2.1 | 2.115155 | 0.000707 hydroxymethylbilane synthase                                              |
| Solyc06g073080.2.1 | 4.773136 | 0.013878 2-oxoglutarate (2OG) and Fe(II)-dependent oxygenase superfamily protein   |
| Solyc04g014900.2.1 | 2.261185 | 0.000214 Leucine-rich receptor-like protein kinase family protein                  |
| Solyc01g088400.2.1 | 2.55705  | 2.19E-08 Fatty acid hydroxylase superfamily                                        |
| Solyc10g008930.1.1 | 5.415038 | 1.99E-09 Thioredoxin superfamily protein                                           |
| Solyc09g006010.2.1 | 1.60671  | 0.016183 pathogenesis-related gene 1                                               |
| Solyc03g044710.2.1 | 3.150635 | 0.000397 phospholipase A 2A                                                        |
| Solyc07g008590.1.1 | 1.572644 | 0.005472 disease resistance family protein / LRR family protein                    |
| Solyc07g008620.1.1 | 2.208277 | 2.04E-06 disease resistance family protein / LRR family protein                    |
| Solyc09g083440.2.1 | 1.655611 | 0.003274 Serine protease inhibitor, potato inhibitor I-type family protein         |
| Solyc09g084480.2.1 | 3.754167 | 2.17E-28 Serine protease inhibitor, potato inhibitor I-type family protein         |
| Solyc05g055540.1.1 | 1.917008 | 0.049714 Major facilitator superfamily protein                                     |
| Solyc10g055810.1.1 | 1.398374 | 1.58E-08 basic chitinase                                                           |
| Solyc10g068350.1.1 | 1.594934 | 0.00285 basic chitinase                                                            |
| Solyc10g074460.1.1 | 2.699916 | 0.000222 basic chitinase                                                           |
| Solyc06g035960.2.1 | 1.793104 | 0.010737 AMP-dependent synthetase and ligase family protein                        |
| Solyc03g095770.2.1 | 1.483342 | 2.15E-05 WRKY DNA-binding protein 70                                               |
| Solyc09g074270.2.1 | 2.016299 | 0.040922 alpha/beta-Hydrolases superfamily protein                                 |
| Solyc08g062930.1.1 | 1.371314 | 0.040922 calmodulin-binding family protein                                         |
| Solyc12g008960.1.1 | 2.706816 | 0.01327 calmodulin-binding family protein                                          |
| Solyc06g073080.2.1 | 4.773136 | 0.013878 2-oxoglutarate (2OG) and Fe(II)-dependent oxygenase superfamily protein   |

Down-regulated:



| <i>ITAG</i>        | <i>log2FC</i> | <i>q-value</i> | <i>Functional Description</i>                                                             |
|--------------------|---------------|----------------|-------------------------------------------------------------------------------------------|
| Solyc07g044860.2.1 | -1.773859     | 0.022822       | photosystem II subunit P-1                                                                |
| Solyc12g011330.2.1 | -1.275852     | 0.046707       | Signal transduction histidine kinase, hybrid-type, ethylene sensor                        |
| Solyc04g079240.2.1 | -2.216969     | 0.015538       | phospholipase A 2A                                                                        |
| Solyc06g066370.2.1 | -1.151764     | 0.003015       | WRKY DNA-binding protein 33                                                               |
| Solyc01g099780.2.1 | -2.066435     | 0.000181       | translationally controlled tumor protein                                                  |
| Solyc02g065400.2.1 | -1.336943     | 0.023129       | photosystem II subunit O-2                                                                |
| Solyc04g012160.2.1 | -1.346069     | 0.000802       | Protein kinase superfamily protein                                                        |
| Solyc04g080960.2.1 | -1.618068     | 1.01E-08       | Papain family cysteine protease                                                           |
| Solyc04g078140.2.1 | -1.161166     | 0.013082       | cytochrome B5 isoform D                                                                   |
| Solyc03g115820.2.1 | -1.342818     | 1.17E-05       | D-ribulose-5-phosphate-3-epimerase                                                        |
| Solyc07g044860.2.1 | -1.773859     | 0.022822       | photosystem II subunit P-1                                                                |
| Solyc04g079240.2.1 | -2.216969     | 0.015538       | phospholipase A 2A                                                                        |
| Solyc06g066370.2.1 | -1.151764     | 0.003015       | WRKY DNA-binding protein 33                                                               |
| Solyc08g079230.1.1 | -2.886709     | 0.001757       | Bifunctional inhibitor/lipid-transfer protein/seed storage 2S albumin superfamily protein |

## Defense response to virus (GO:0051607)

Up-regulated genes:

2

| <i>ITAG</i>        | <i>log2FC</i> | <i>q-value</i> | <i>Functional Description</i> |
|--------------------|---------------|----------------|-------------------------------|
| Solyc10g006200.2.1 | 1.587426      | 0.029986       | dicer-like 1                  |
| Solyc03g044710.2.1 | 3.150635      | 0.000397       | phospholipase A 2A            |

Total number of Up-regulated genes: 1115

Total number of the group: 115

Hipergeometric probabilist for gene enrichment: 0.887503

Down-regulated genes:

1

| <i>ITAG</i>        | <i>log2FC</i> | <i>q-value</i> | <i>Functional Description</i> |
|--------------------|---------------|----------------|-------------------------------|
| Solyc04g079240.2.1 | -2.216969     | 0.015538       | phospholipase A 2A            |

Total number of Up-regulated genes: 758

Total number of the group: 115

Hipergeometric probabilist for gene enrichment: 0.921305

## Virus induced gene silencing (GO:0009616)

Up-regulated:

6

| <i>ITAG</i>        | <i>log2FC</i> | <i>q-value</i> | <i>Functional Description</i>                       |
|--------------------|---------------|----------------|-----------------------------------------------------|
| Solyc10g006200.2.1 | 1.587426      | 0.029986       | dicer-like 1                                        |
| Solyc06g065450.2.1 | 2.753475      | 3.31E-06       | forkhead-associated (FHA) domain-containing protein |
| Solyc08g082040.2.1 | 2.067544      | 0.026745       | Protein of unknown function (DUF3133)               |
| Solyc04g015030.2.1 | 3.168099      | 3.03E-18       | farnesylated protein 3                              |
| Solyc04g076850.2.1 | 0.591435      | 0.00391        | indole-3-acetic acid inducible 9                    |
| Solyc04g076850.2.1 | 0.591435      | 0.00391        | indole-3-acetic acid inducible 9                    |

Down-regulated:

1

| <i>ITAG</i>        | <i>log2FC</i> | <i>q-value</i> | <i>Functional Description</i> |
|--------------------|---------------|----------------|-------------------------------|
| Solyc07g062300.2.1 | -2.533176     | 0.024733       | NHL domain-containing protein |

## Resistance protein-related genes

Up-regulated:

7

| <i>ITAG</i>        | <i>log2FC</i> | <i>q-value</i> | <i>Functional Description</i>                                        |
|--------------------|---------------|----------------|----------------------------------------------------------------------|
| Solyc02g032050.1.1 | 1.620579      | 0.040756       | Disease resistance-responsive (dirigent-like protein) family protein |
| Solyc05g042090.1.1 | 4.90746       | 5.24E-06       | NB-ARC domain-containing disease resistance protein                  |
| Solyc07g008590.1.1 | 1.572644      | 0.005472       | disease resistance family protein / LRR family protein               |
| Solyc07g008620.1.1 | 2.208277      | 2.04E-06       | disease resistance family protein / LRR family protein               |
| Solyc08g081780.1.1 | 1.470947      | 0.002868       | Disease resistance-responsive (dirigent-like protein) family protein |
| Solyc12g044190.1.1 | 3.942548      | 1.63E-12       | LRR and NB-ARC domains-containing disease resistance protein         |
| Solyc12g097010.1.1 | 1.982315      | 0.001088       | disease resistance protein (TIR-NBS-LRR class), putative             |

Total number of Up-regulated genes: 1115

Total number of the group: 450

Hipergeometric probabilist for gene enrichment: 0.990446

Down-regulated:

2

| <i>ITAG</i> | <i>log2FC</i> | <i>q-value</i> | <i>Functional Description</i> |
|-------------|---------------|----------------|-------------------------------|
|-------------|---------------|----------------|-------------------------------|

|                    |           |          |                                                     |
|--------------------|-----------|----------|-----------------------------------------------------|
| Solyc05g054340.2.1 | -1.75207  | 0.000112 | NB-ARC domain-containing disease resistance protein |
| Solyc07g061940.2.1 | -1.119795 | 0.004234 | chlorsulfuron/imidazolinone resistant 1             |

Total number of Up-regulated genes: 758

Total number of the group: 450

Hipergeometric probabilist for gene enrichment: 0.999491

**Table S4. Functional overlap DE defense-related genes up-regulated in CLN2777 (resistant) by 3, 5, and 7 dpi and in T474D infected by 10 dpi**

| ITAG               | LOG2FC      | Q-VALUE     | GO                                                     | DESCRIPTION                                                            | FUNCTIONAL TERM                  |
|--------------------|-------------|-------------|--------------------------------------------------------|------------------------------------------------------------------------|----------------------------------|
| Solyc12g006910.1.1 | 1.437488357 | 0.000256891 |                                                        | cadmium tolerance 1                                                    | cadmium tolerance                |
| Solyc06g065570.2.1 | 1.099197794 | 0.003977388 | GO:0008080,GO:0016747,GO:0008152                       | Acyl-CoA N-acyltransferases (NAT) superfamily protein                  | acyltransferase                  |
| Solyc08g078120.1.1 | 1.119007505 | 0.012176808 |                                                        | Acyl-CoA N-acyltransferase with RING/FYVE/PHD-type zinc finger protein | acyltransferase                  |
| Solyc09g008520.2.1 | 1.292201253 | 3.46E-02    | GO:0005515                                             | Acyl-CoA N-acyltransferase with RING/FYVE/PHD-type zinc finger domain  | acyltransferase                  |
| Solyc11g017250.1.1 | 1.751107855 | 0.002179764 | GO:0016746,GO:0008152,GO:0008415                       | 2-oxoacid dehydrogenases acyltransferase family protein                | acyltransferase                  |
| Solyc06g074030.1.1 | 2.074839924 | 7.25E-05    | GO:0005634                                             | Polynucleotidyl transferase, ribonuclease H-like superfamily protein   | ribonuclease                     |
| Solyc04g011430.2.1 | 2.132076671 | 0.034795837 | GO:0016881                                             | ubiquitin carrier protein 7                                            | ubiquitin                        |
| Solyc09g017980.1.1 | 2.641368759 | 0.038145499 | GO:0004221,GO:0006511                                  | ubiquitin-specific protease 20                                         | ubiquitin                        |
| Solyc10g081500.1.1 | 1.288849101 | 9.39E-05    | GO:0005515,GO:0005198                                  | protein kinases;ubiquitin-protein ligases                              | ubiquitin                        |
| Solyc12g099030.1.1 | 0.891122674 | 0.010381067 | GO:0005515,GO:0003735,GO:0006412,GO:0005622,GO:0005840 | ubiquitin 6                                                            | ubiquitin                        |
| Solyc11g013110.1.1 | 1.451913705 | 0.001383335 | GO:0016491,GO:0016706,GO:0055114                       | flavonol synthase 1                                                    | flavonol synthase 1              |
| Solyc02g088830.2.1 | 1.546356738 | 0.022099189 |                                                        | hydroxyproline-rich glycoprotein family protein                        | hydroxyproline-rich glycoprotein |
| Solyc10g078160.1.1 | 1.187143132 | 0.048966799 |                                                        | hydroxyproline-rich glycoprotein family protein                        | hydroxyproline-rich glycoprotein |
| Solyc08g080620.1.1 | 3.108395737 | 1.23201E-09 |                                                        | osmotin 34                                                             | osmotin                          |
| Solyc05g006730.2.1 | 2.355051524 | 0.018046248 | GO:0005515                                             | Glutathione S-transferase family protein                               | Glutathione S-transferase        |
| Solyc03g115120.1.1 | 2.264334786 | 1.91E-02    | GO:0031072                                             | DNAJ heat shock N-terminal domain-containing protein                   | heat shock                       |
| c04g005900.2.1     | 1.560832185 | 0.040388262 | GO:0005515                                             | F-box/RNI-like superfamily protein                                     | F-box                            |
